# Supplementary figures and images for: Inorganic Polyphosphate Promotes Colorectal Cancer Growth via TRPM8 Receptor Signaling Pathway
Source: Preprints.org preprint supplement (doi:10.20944/preprints202409.0739.v1), 2024-09-10

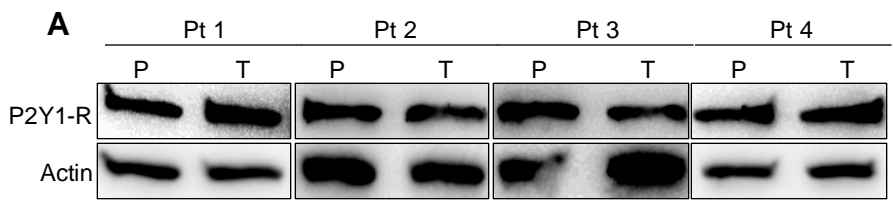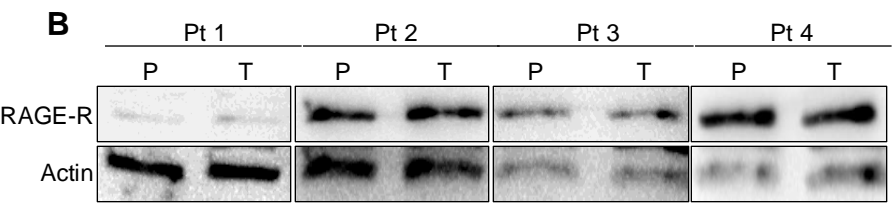

**A**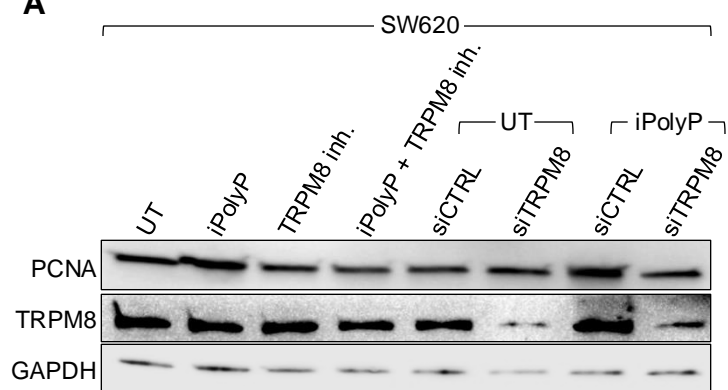**B**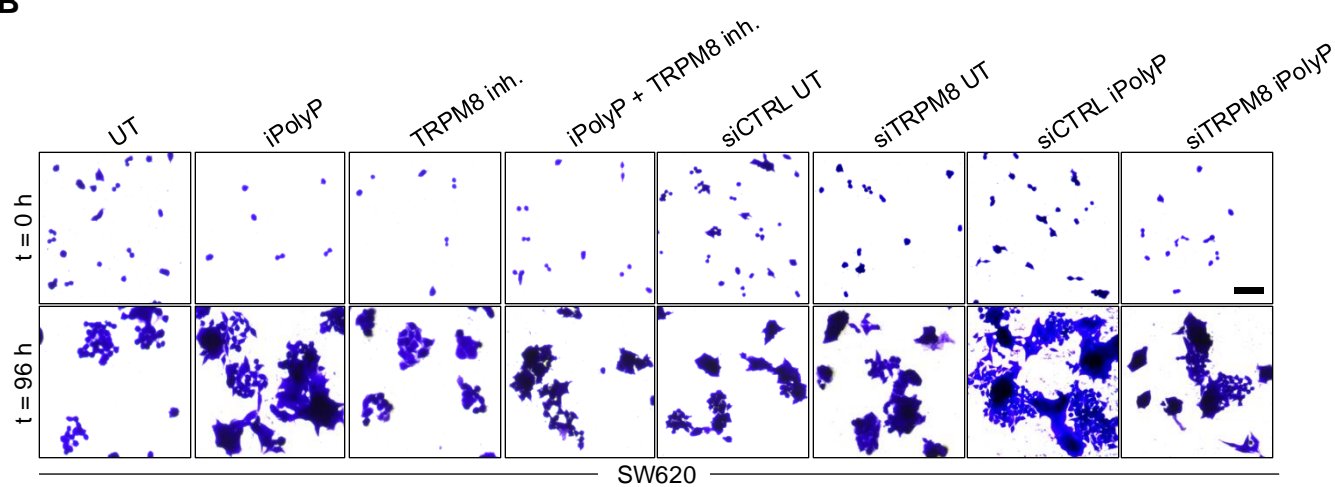**C**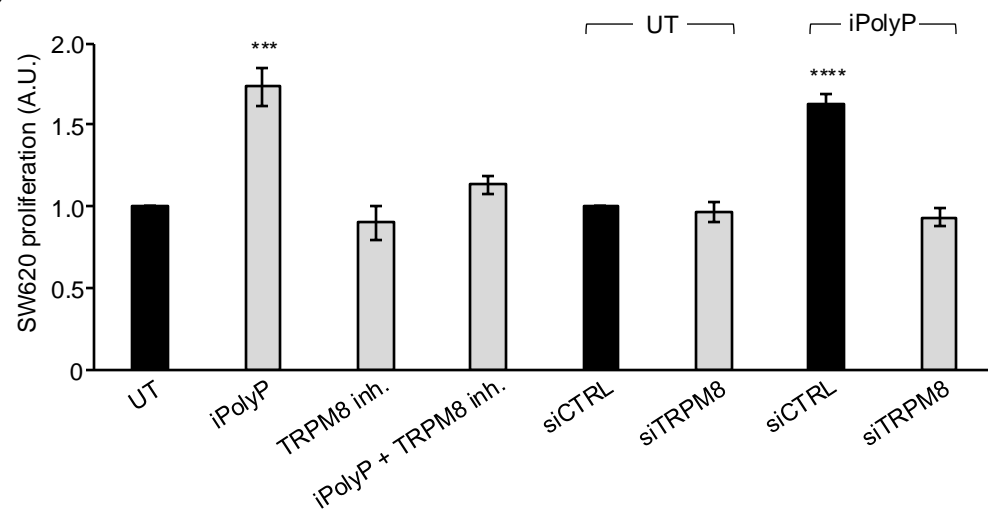

**A**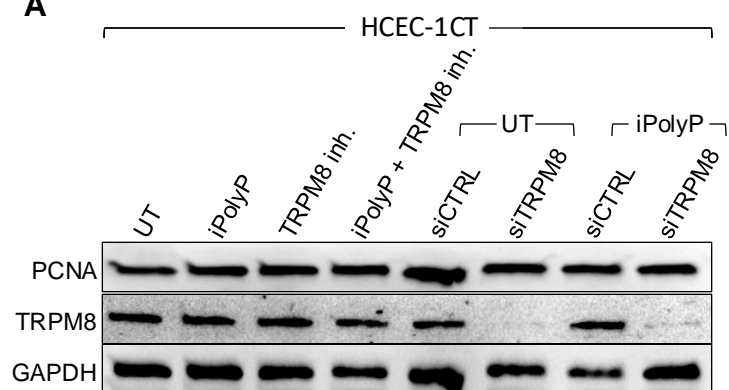**B**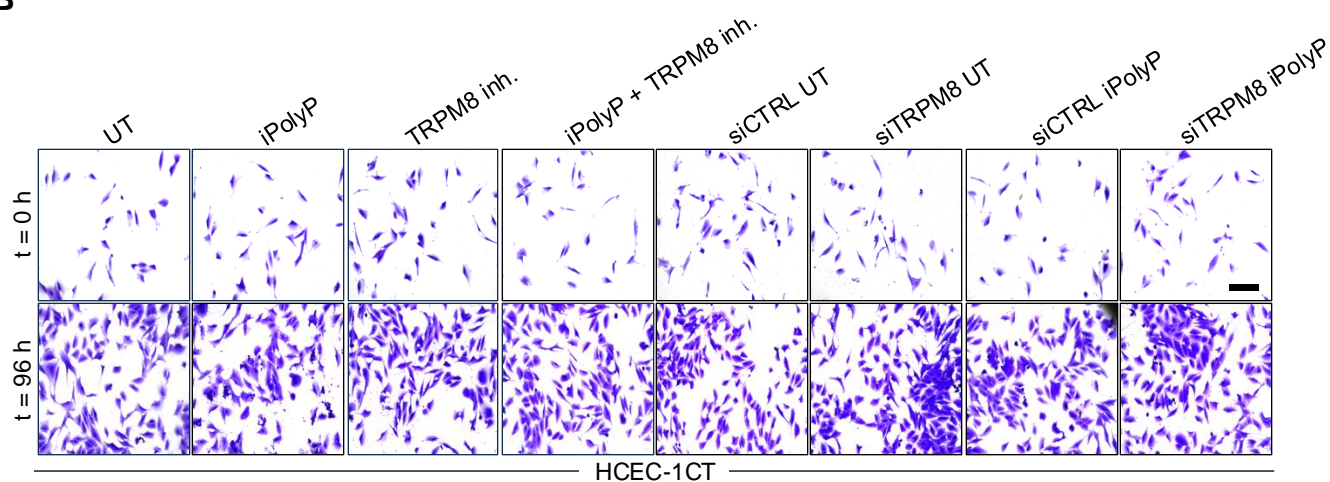**C**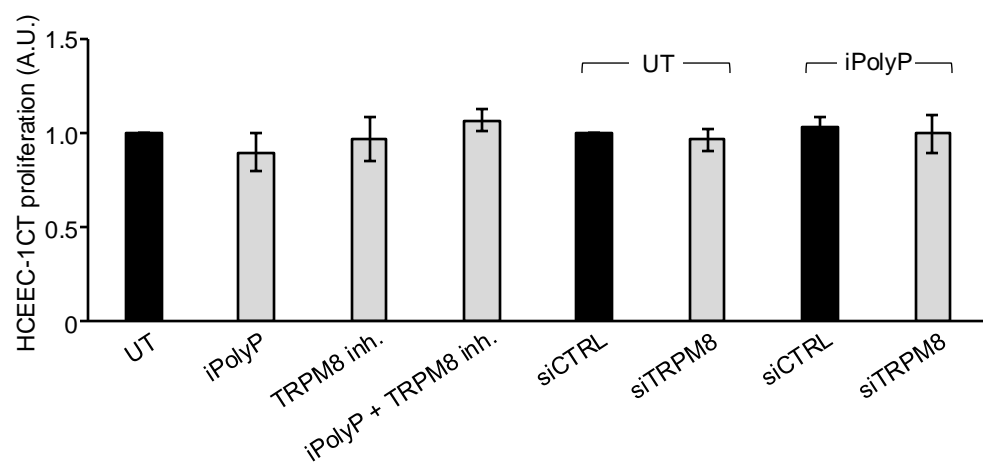

**A**

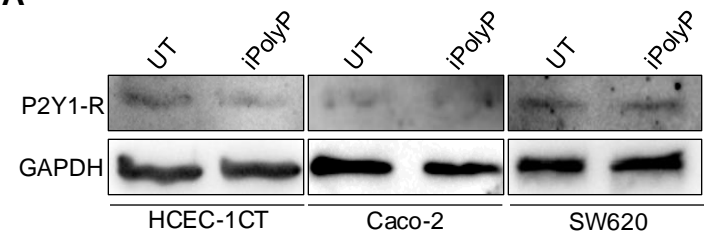

**B**

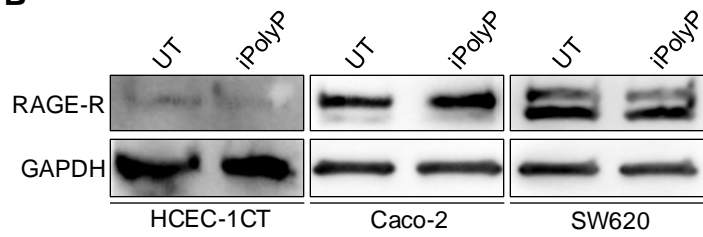

**C**

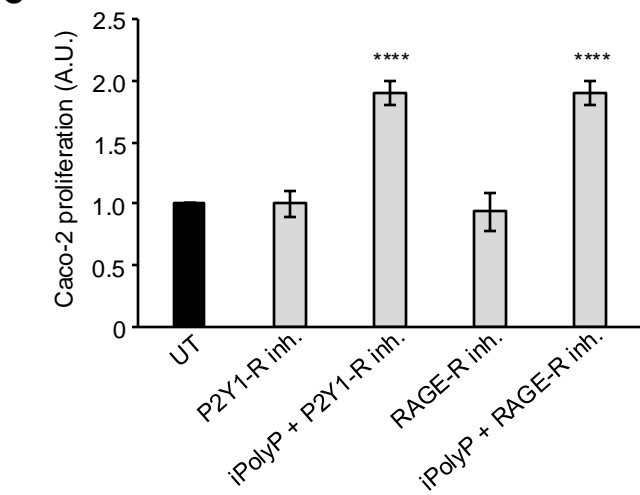

**D**

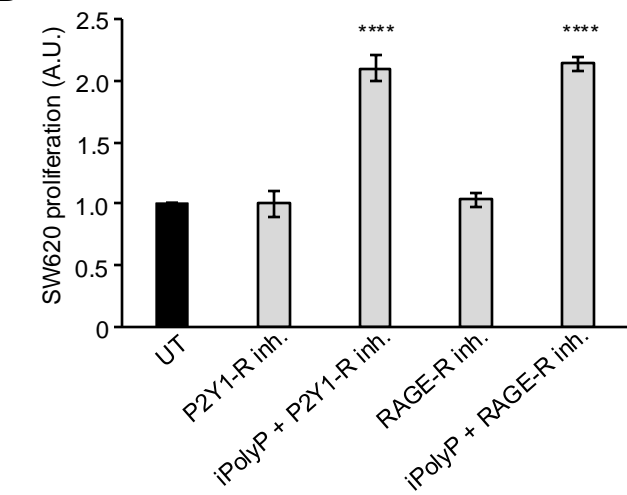

**A**

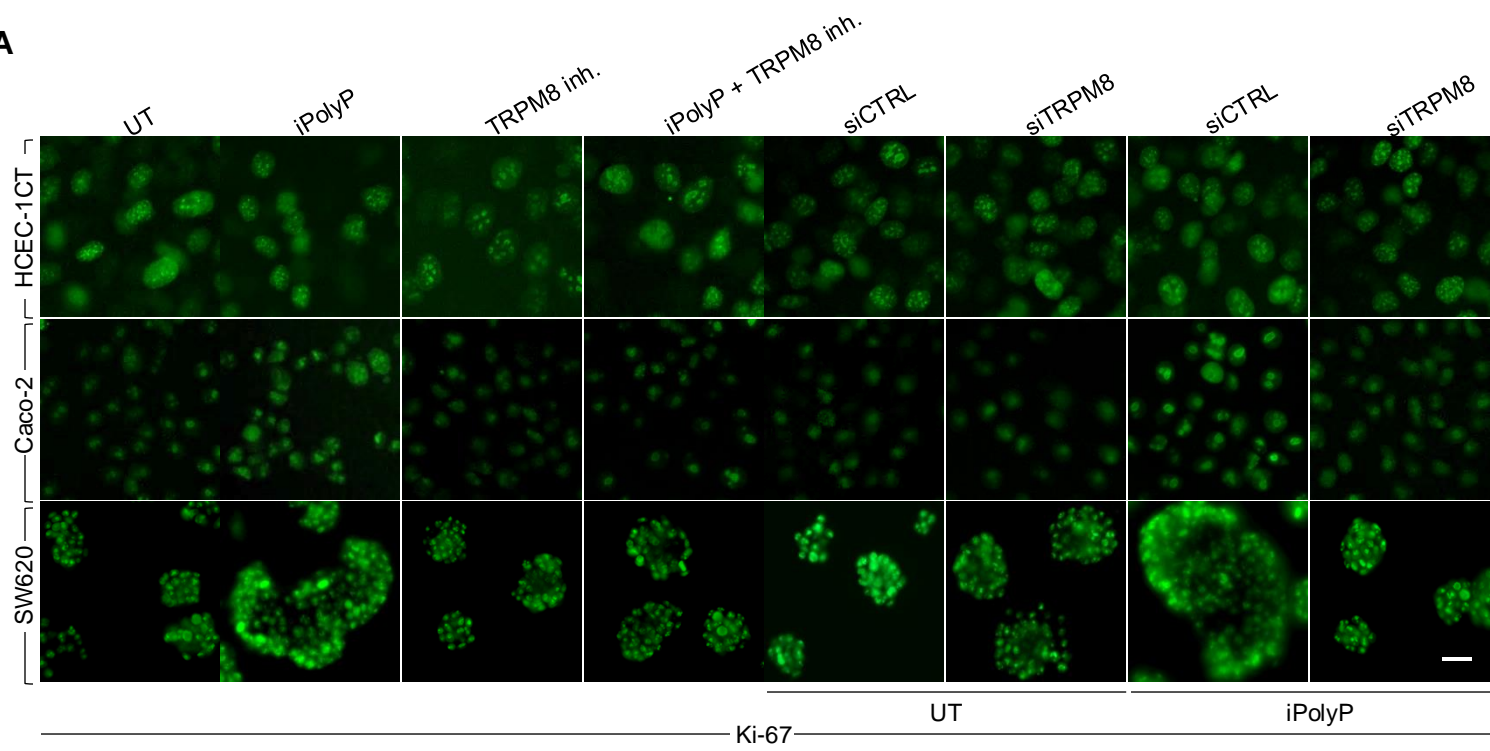

**B**

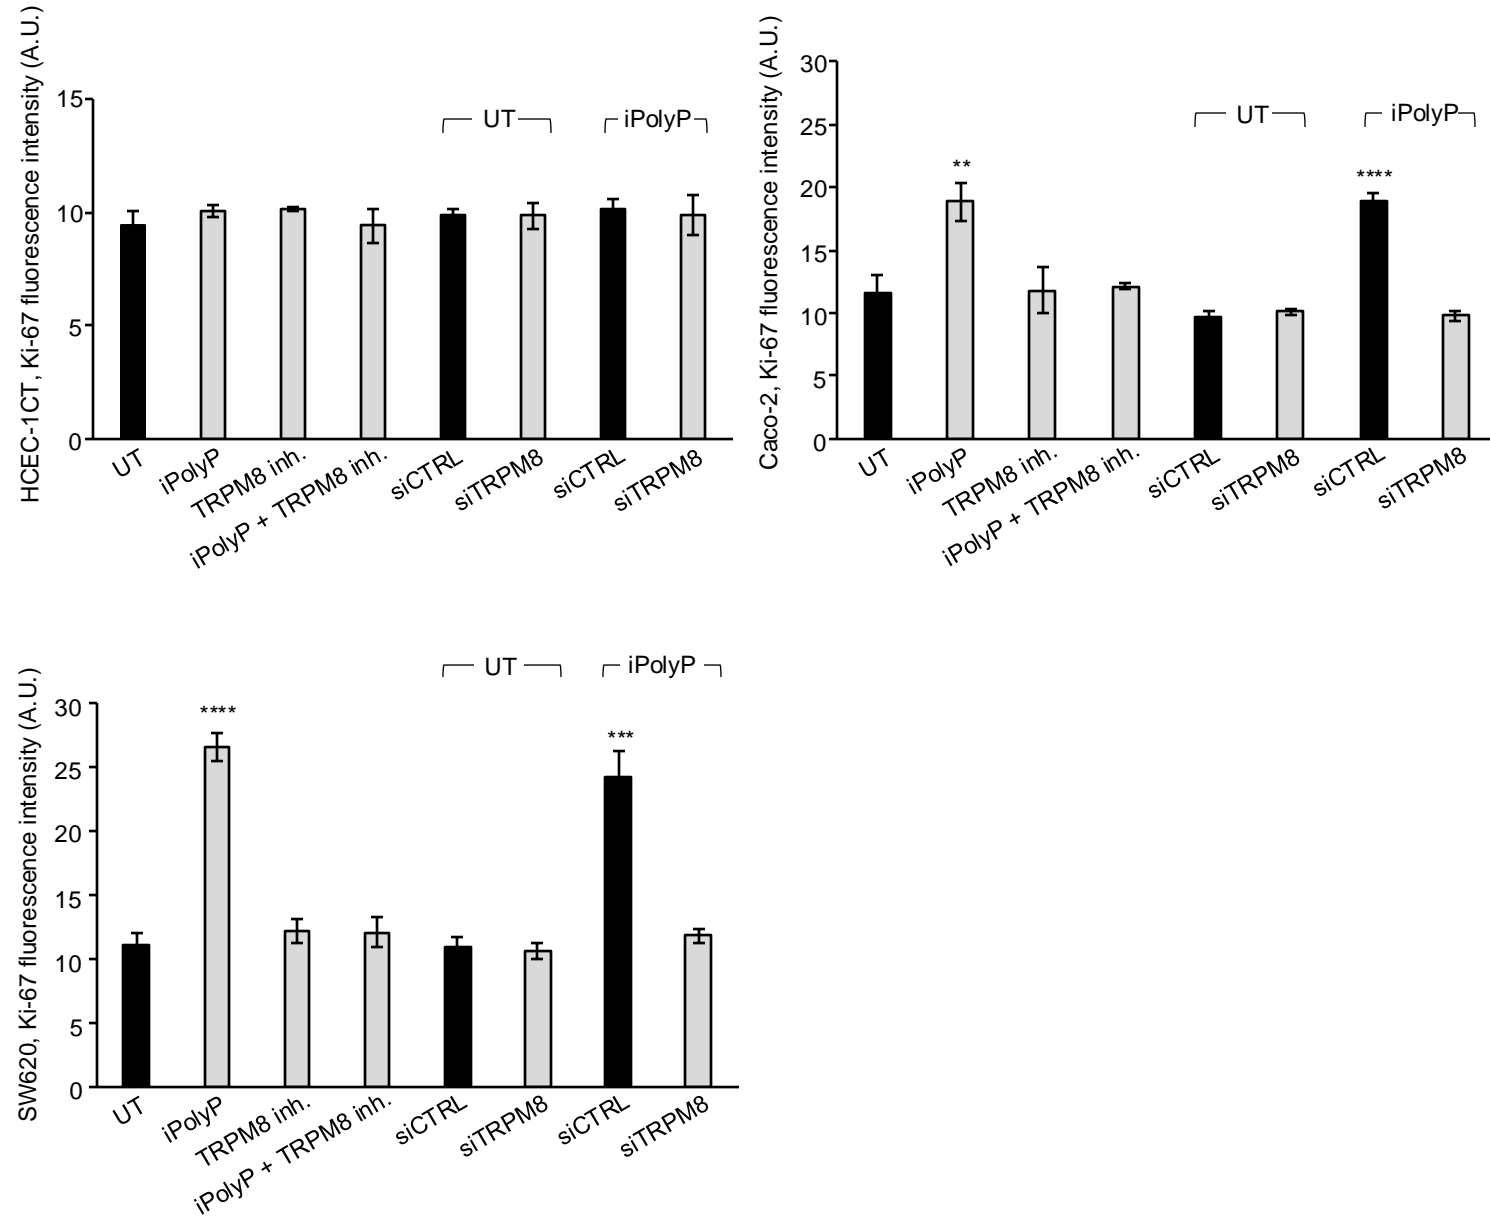

Supplement: Supplementary file 1 [file Supplementary files.pdf › Supplementary files.pdf]
